# Supplementary material
Source: publisher figshare collection journal article supplement (https://future-science-group.figshare.com/ndownloader/files/29379765)
Supplement: Supplementary file 1 [file 29379765]

# RaPiDS (GOG-3028): Randomized Phase II study of balstilimab alone or in combination with zalifrelimab in cervical cancer

## Authors

David M O'Malley, Leslie M Randall, Camille Gunderson Jackson, Robert L. Coleman, John L. Hays, Kathleen N. Moore, R. Wendel Naumann, Rodney P. Rocconi, Brian M. Slomovitz, Krishnansu S. Tewari, Marek Ancukiewicz, Waldo Ortuzar Feliu & Bradley J Monk

**Trial registration no:**  
NCT03894215

## Article URL

[www.futuremedicine.com/doi/10.2217/fon-2021-0529](http://www.futuremedicine.com/doi/10.2217/fon-2021-0529)

## Primary objective

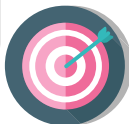

### Primary objective

To evaluate ORR, per RECIST v1.1 and assessed by IRRC, for balstilimab plus placebo (monotherapy) and in combination with zalifrelimab

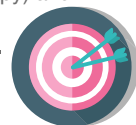

## Secondary key objectives

- To confirm the safety and tolerability of balstilimab as monotherapy and in combination with zalifrelimab
- To determine PFS, assessed by IRRC and investigators, for balstilimab monotherapy and in combination with zalifrelimab
- To assess DOR, per RECIST v1.1 and assessed by IRRC, for balstilimab monotherapy and in combination with zalifrelimab
- To evaluate OS for balstilimab monotherapy and in combination with zalifrelimab

## Study design and treatment

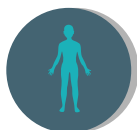

Approximately  
210 patients

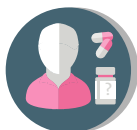

Randomized 1:1

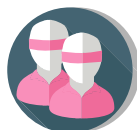

Double blind

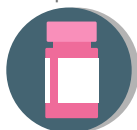

Non-comparative

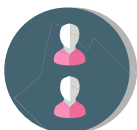

Two-arm

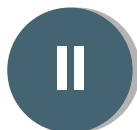

Phase II trial

- In Arm 1, placebo will be administered with balstilimab at corresponding time points to zalifrelimab dosing in Arm 2.
- The blinded portion of the study applies to whether zalifrelimab or placebo is administered; balstilimab dosing is not blinded.
- Each treatment cycle is 6 weeks.

## Key eligibility criteria

$\geq 18$

Age  $\geq 18$  years

RECIST  
v1.1

Measurable  
disease per  
RECIST v1.1

ECOG PS  
0 or 1

ECOG PS 0 or 1

Histologically or cytologically confirmed diagnosis of recurrent/metastatic squamous cell carcinoma, adenosquamous carcinoma, or adenocarcinoma of the cervix.

Patients must have relapsed after a first-line, platinum-based treatment regimen for metastatic, persistent, and/or unresectable disease.

No prior therapy with a checkpoint inhibitor.

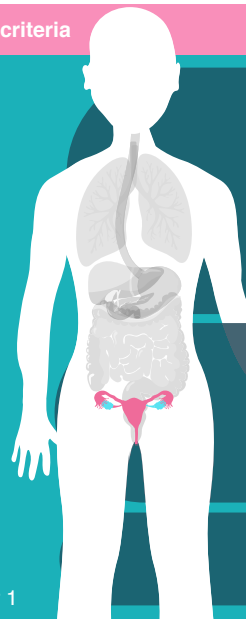

Adult patients with recurrent/persistent/metastatic cervical cancer  
One prior platinum-based regimen for advanced disease  
Target enrollment n = 210

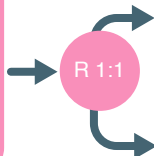

Balstilimab 300 mg  
Q3W + placebo

Balstilimab 300 mg Q3W +  
Zalifrelimab 1mg/kg Q6W

Treatment is permitted for up to 24 months, or until disease progression, development of unacceptable toxicity, or investigator/patient decision to withdraw

- Non-comparative trial design
- No patient stratification

## Outcome measures/end points

### Primary end point:

ORR for each treatment arm

### Key secondary end points:

DOR, DCR, PFS, OS, safety and tolerability for each treatment arm

### Exploratory end points:

Association of tumor PD-L1 expression with response;  
Association of TMB with response

## Glossary

DCR: Disease control rate; DOR: Duration of response; IRRC: Independent Radiology Review Committee; IV: Intravenously; ECOG PS: Eastern Cooperative Oncology Group performance status; ORR: Objective response rate; OS: Overall survival; PFS: Progression-free survival; PD-L1: Programmed death ligand 1; Q3W: Once every three weeks; Q6W: Once every 6 weeks; RECIST: Response Evaluation Criteria in Solid Tumors; TMB: Tumor mutational burden
